# Supplementary material for: Acute-on-chronic liver failure as a major predictive factor for mortality in patients with variceal bleeding
Source: PubMed Central journal article supplement — Clin Mol Hepatol. 2020 Sep 17;26(4):540–53. doi: 10.3350/cmh.2020.0034 (PMC7641565; doi:10.3350/cmh.2020.0034), 2020-09-17
Supplement: cmh-2020-0034-suppl1.pdf [file cmh-2020-0034-suppl1.pdf]

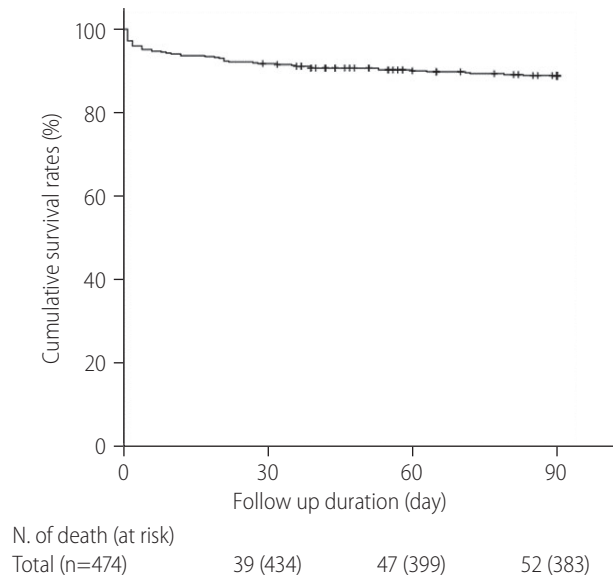

**Supplementary Figure 1.** Cumulative overall survival rates of all patients. Cumulative OS rates at 28- and 90-days were 91.8% and 88.1%, respectively. OS, overall survival.
