# Supplementary material for: Acute-on-chronic liver failure as a major predictive factor for mortality in patients with variceal bleeding
Source: PubMed Central journal article supplement — Clin Mol Hepatol. 2020 Sep 17;26(4):540–53. doi: 10.3350/cmh.2020.0034 (PMC7641565; doi:10.3350/cmh.2020.0034), 2020-09-17
Supplement: cmh-2020-0034-suppl2.pdf [file cmh-2020-0034-suppl2.pdf]

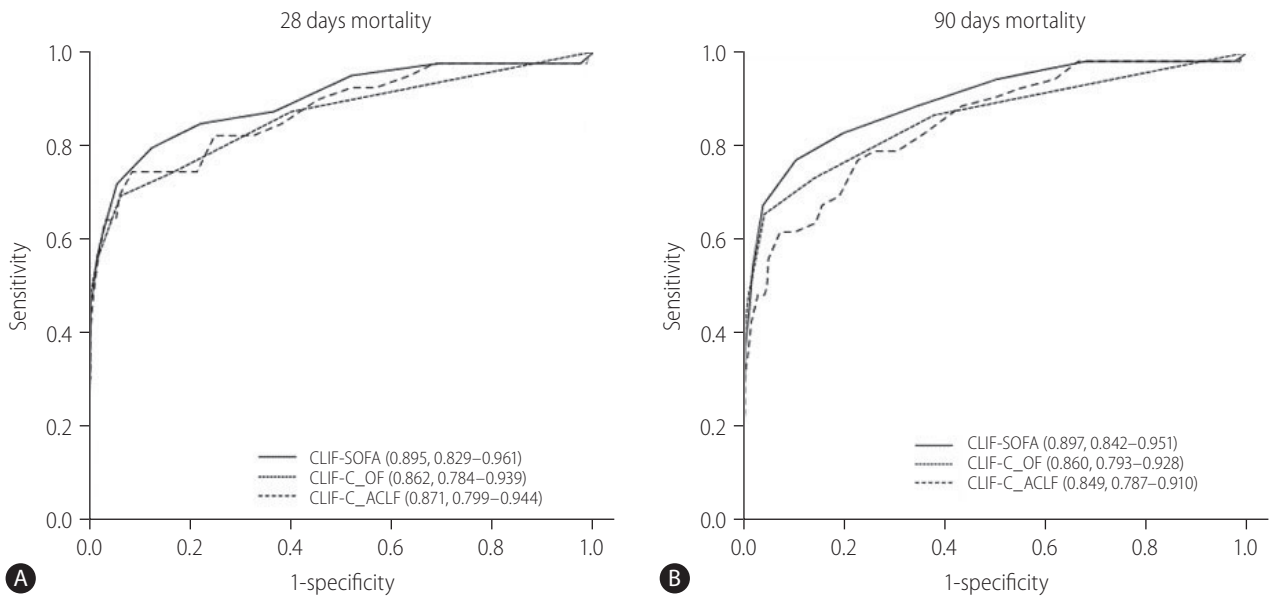

**Supplementary Figure 2.** Areas under the receiver operating curves of the CLIF-SOFA score compared to CLIF-C OF and CLIF-C ALF for the 28- and 90-day mortalities in patients with variceal bleeding. AUROCs of CLIF-SOFA score for predicting the 28-day (A) and 90-day (B) mortality were higher than those of CLIF-C OF (0.860 [95% CI, 0.793–0.928] and 0.862 [95% CI, 0.784–0.939], respectively) and CLIF-C ALF (0.849 [95% CI, 0.787–0.910] and 0.871 [95% CI, 0.799–0.944], respectively). CLIF-SOFA, chronic liver failure-sequential organ failure assessment; CLIF-C, chronic liver failure consortium; OF, organ failure; ALF, acute liver failure; AUROC, areas under receiver operating curves; CI, confidence interval.
