# Supplementary material for: Acute-on-chronic liver failure as a major predictive factor for mortality in patients with variceal bleeding
Source: PubMed Central journal article supplement — Clin Mol Hepatol. 2020 Sep 17;26(4):540–53. doi: 10.3350/cmh.2020.0034 (PMC7641565; doi:10.3350/cmh.2020.0034), 2020-09-17
Supplement: cmh-2020-0034-suppl3.pdf [file cmh-2020-0034-suppl3.pdf]

**Supplementary Table 1.** Cause of mortality for 28- and 90-day in all patients with variceal bleeding (n=474)

| Cause                          | 28-day (n=39) | 90-day (n=52) |
|--------------------------------|---------------|---------------|
| Hepatic failure                | 10 (25.6)     | 15 (28.8)     |
| Varix bleeding                 | 13 (33.3)     | 13 (25.0)     |
| Hepatic failure+varix bleeding | 14 (36.0)     | 14 (26.9)     |
| Unknown                        | 2 (5.1)       | 10 (19.2)     |

Values are presented as number (%).
