# Supplementary material for: Acute-on-chronic liver failure as a major predictive factor for mortality in patients with variceal bleeding
Source: PubMed Central journal article supplement — Clin Mol Hepatol. 2020 Sep 17;26(4):540–53. doi: 10.3350/cmh.2020.0034 (PMC7641565; doi:10.3350/cmh.2020.0034), 2020-09-17
Supplement: cmh-2020-0034-suppl4.pdf [file cmh-2020-0034-suppl4.pdf]

**Supplementary Table 2.** CLIF-SOFA variables as risk factors for 28-day mortality in all patients with variceal bleeding (n=474)\*

| Variable                                  | Univariate analysis |         | Multivariate analysis |         |
|-------------------------------------------|---------------------|---------|-----------------------|---------|
|                                           | HR (95% CI)         | P-value | HR (95% CI)           | P-value |
| Bilirubin (mg/dL)                         | 1.10 (1.07–1.13)    | <0.001  | 1.03 (0.99–1.07)      | 0.152   |
| Creatinine (mg/dL)                        | 1.43 (1.27–1.60)    | <0.001  | 1.29 (1.09–1.53)      | 0.003   |
| HE (presence)                             | 6.57 (3.02–14.31)   | <0.001  | 3.30 (1.39–7.87)      | 0.007   |
| Prothrombin time (INR)                    | 3.19 (2.48–4.10)    | <0.001  | 2.20 (1.62–3.00)      | <0.001  |
| MAP (<70 mmHg)                            | 1.50 (0.63–3.59)    | 0.358   |                       |         |
| PaO <sub>2</sub> /FiO <sub>2</sub> (≤400) | 1.20 (0.67–3.07)    | 0.705   |                       |         |

CLIF SOFA, the chronic liver failure-sequential organ failure assessment; HR, hazard ratio; CI, confidence interval; HE, hepatic encephalopathy; INR, international ratio; MAP, mean arterial pressure; PaO<sub>2</sub>, partial pressure of arterial oxygen; FiO<sub>2</sub>, fraction of inspired oxygen.

\*Subjects (n=474), event: death (n=39).
